# Supplementary material for: Behavior of Regular Insulin in a Parenteral Nutrition Admixture: Validation of an LC/MS-MS Assay and the In Vitro Evaluation of Insulin Glycation
Source: MDPI journal article supplement (doi:10.3390/pharmaceutics14051081), 2022-05-18
Supplement: s1 [file s1]

## Supplementary data

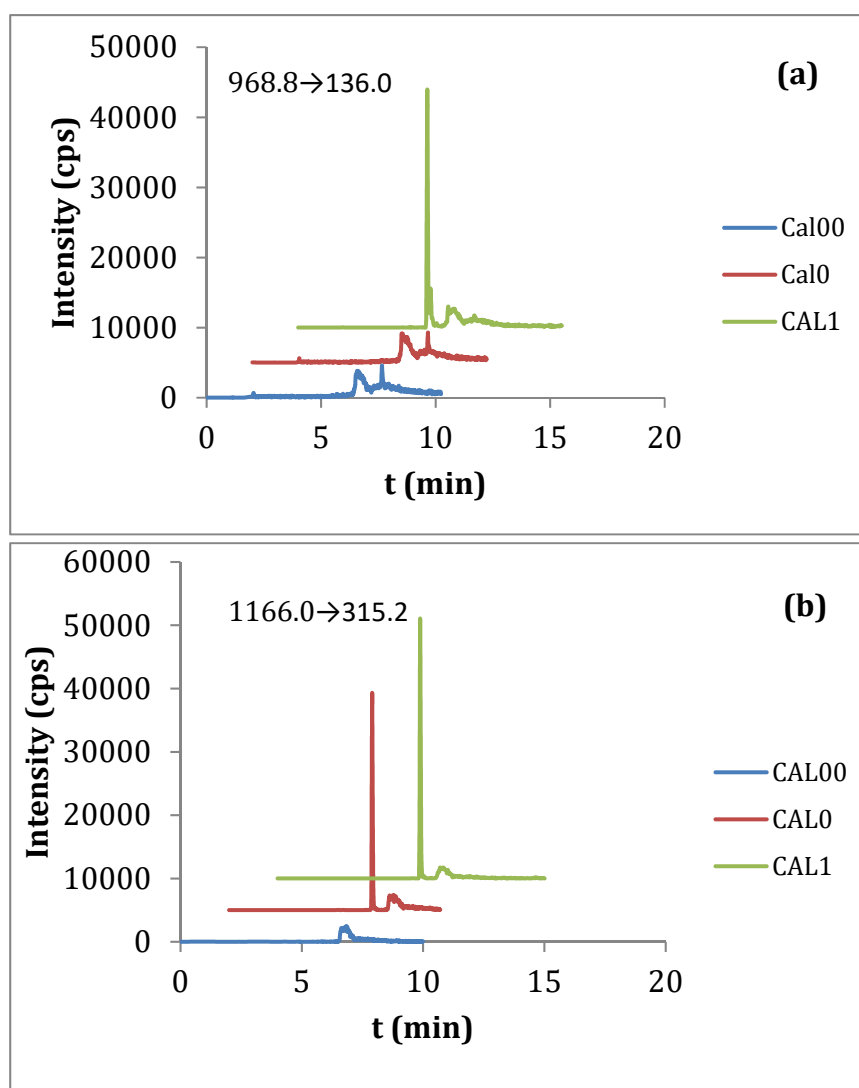

Figure S1: Illustration of the specificity of the method in MRM mode at (a) the R-insulin transition (968.8→136.0) and (b) the IS transition (1166.0→315.2): chromatograms of a matrix blank sample (CAL00), a matrix blank sample spiked with IS (0.060 mg/L; CAL0), and CAL0 additionally spiked with a mixture of R-insulin and glycated R-insulin at a total concentration of 0.016 mg/L (CAL1:  $C_{\text{R-insulin}} = 0.010$  mg/L and  $C_{\text{glycated R-insulin}} = 0.0060$  mg/L) (CAL1).

Table S1: Validation of the LC-MS/MS R-insulin assay: response function, linearity, trueness, and precision.

|                                |                                     |                            |
|--------------------------------|-------------------------------------|----------------------------|
| Validation parameters          |                                     |                            |
| Response function <sup>a</sup> |                                     |                            |
| Concentration range (mg/L)     | 0.010 – 0.10                        |                            |
| f(X)                           | Y = 19.72 X + 0.0340                |                            |
| Linearity                      |                                     |                            |
| Slope                          | 1.011                               |                            |
| Y intercept                    | -7.87.10 <sup>-6</sup>              |                            |
| R <sup>2</sup>                 | 0.9894                              |                            |
| Trueness                       | C <sub>back-calculated</sub> (mg/L) | Relative bias (%)          |
| VS1                            | 0.0099                              | -0.68                      |
| VS2                            | 0.019                               | -6.01                      |
| VS3                            | 0.070                               | -0.21                      |
| VS4                            | 0.100                               | 0.48                       |
| Precision                      | Intraday precision (% RSD)          | Inter-day precision (%RSD) |
| VS1                            | 10.9                                | 10.9                       |
| VS2                            | 5.70                                | 6.25                       |
| VS3                            | 6.05                                | 8.58                       |
| VS4                            | 5.08                                | 5.79                       |

<sup>a</sup> Calibration curves expressing the peak area ratio (R-insulin/IS) vs. the R-insulin concentration were obtained from six calibration standards using least-squares-weighted (1/X) linear regression

VS: validation standard; RSD: relative standard deviation
